# Supplementary material for: The Performance Gap in Sport Can Help Determine Which Movements Were Most Essential to Human Evolution
Source: Front Physiol. 2019 Nov 19;10:1412. doi: 10.3389/fphys.2019.01412 (PMC6877502; doi:10.3389/fphys.2019.01412)
Supplement: Supplementary file 1 [file Data_Sheet_1.XLSX]

## Sheet: SES Raw Data (records)
Marathon						Marathon							Half Marathon														10 k													5 k
Rank	Mark	Competitor (Male)		Country	Rank	Mark	Competitor (Female)		Country				Rank	Mark (mm:ss:00)	Competitor (Male)		Country	Mark (mm:ss)	Rank	Mark	Competitor (Female)		Country				Rank	Mark	Competitor (Male)		Country	Rank	Mark	Competitor (Female)		Country	SES (10KM OUTDOOR)			Rank	Mark	Competitor (Male)		Country	Rank	Mark	Competitor (Female)		Country
1	02:02:57	Dennis KIMETTO			1	02:15:25	Paula RADCLIFFE						1	2 days, 10:23:00	Zersenay TADESE			00:58:23	1	01:04:51	Joyciline JEPKOSGEI						1	00:26:17.530000	Kenenisa BEKELE			1	00:29:17.450000	Almaz AYANA			88.365			1	00:12:37.350000	Kenenisa BEKELE			1	00:14:11.150000	Tirunesh DIBABA
2	02:03:03	Kenenisa BEKELE			2	02:17:01	Mary Jepkosgei KEITANY						2	2 days, 10:31:00	Zersenay TADESE			00:58:31	2	01:04:52	Joyciline JEPKOSGEI						2	00:26:20.310000	Kenenisa BEKELE			2	00:29:31.780000	Junxia WANG						2	00:12:39.360000	Haile GEBRSELASSIE			2	00:14:12.590000	Almaz AYANA
3	02:03:05	Eliud KIPCHOGE			3	02:17:18	Paula RADCLIFFE						3	2 days, 10:33:00	Samuel Kamau WANJIRU			00:58:33	2	01:04:52	Fancy CHEMUTAI						3	00:26:22.750000	Haile GEBRSELASSIE			3	00:29:32.530000	Vivian Jepkemoi CHERUIYOT						3	00:12:39.740000	Daniel KOMEN			3	00:14:12.880000	Meseret DEFAR
4	02:03:13	Emmanuel MUTAI			4	02:17:42	Paula RADCLIFFE						4	2 days, 10:40:00	Abraham CHEROBEN			00:58:40	4	01:04:55	Mary Jepkosgei KEITANY						4	00:26:25.970000	Kenenisa BEKELE			4	00:29:42.560000	Tirunesh DIBABA						4	00:12:40.180000	Kenenisa BEKELE			4	00:14:14.320000	Almaz AYANA
4	02:03:13	Wilson Kipsang KIPROTICH			5	02:17:56	Tirunesh DIBABA						5	2 days, 10:42:00	Bitan KAROKI			00:58:42	5	01:05:06	Peres JEPCHIRCHIR						5	00:26:27.850000	Paul TERGAT			5	00:29:53.510000	Alice Aprot NAWOWUNA						5	00:12:41.860000	Haile GEBRSELASSIE			5	00:14:15.410000	Genzebe DIBABA
6	02:03:23	Wilson Kipsang KIPROTICH			6	02:18:31	Tirunesh DIBABA						6	2 days, 10:46:00	Matthew Kipkoech KISORIO			00:58:46	6	01:05:07	Caroline Chepkoech KIPKIRUI						6	00:26:28.720000	Kenenisa BEKELE			6	00:29:53.800000	Meselech MELKAMU						6	00:12:44.390000	Haile GEBRSELASSIE			6	00:14:16.310000	Almaz AYANA
7	02:03:32	Eliud KIPCHOGE			7	02:18:37	Mary Jepkosgei KEITANY						7	2 days, 10:47:00	Atsedu TSEGAY			00:58:47	7	01:05:09	Florence KIPLAGAT						7	00:26:29.220000	Haile GEBRSELASSIE			7	00:29:54.660000	Tirunesh DIBABA						7	00:12:44.900000	Daniel KOMEN			7	00:14:16.630000	Meseret DEFAR
8	02:03:38	Patrick Makau MUSYOKI			8	02:18:47	Catherine NDEREBA						8	2 days, 10:48:00	Sammy KITWARA			00:58:48	8	01:05:12	Florence KIPLAGAT						8	00:26:30.030000	Nicholas KEMBOI			8	00:29:59.200000	Meseret DEFAR						8	00:12:45.090000	Daniel KOMEN			8	00:14:18.370000	Hellen OBIRI
9	02:03:42	Wilson Kipsang KIPROTICH			9	02:18:56	Paula RADCLIFFE						8	2 days, 10:48:00	Abraham CHEROBEN			00:58:48	9	01:05:13	Mary Jepkosgei KEITANY						9	00:26:30.740000	Abebe Dinkesa NEGERA			9	00:30:01.090000	Paula RADCLIFFE						9	00:12:46.530000	Eliud KIPCHOGE			9	00:14:18.890000	Almaz AYANA
10	02:03:45	Dennis KIMETTO			10	02:18:58	Erba Tiki GELANA						8	2 days, 10:48:00	Jorum OKOMBO			00:58:48	10	01:05:22	Violah JEPCHUMBA						10	00:26:31.320000	Haile GEBRSELASSIE			10	00:30:04.180000	Berhane ADERE						10	00:12:46.810000	Dejen GEBREMESKEL			10	00:14:19.760000	Genzebe DIBABA
11	02:03:46	Guye Idemo ADOLA			11	02:19:12	Mizuki NOGUCHI						11	2 days, 10:51:00	Alex KORIO			00:58:51	11	01:05:36	Fancy CHEMUTAI						11	00:26:35.630000	Micah Kemboi KOGO			11	00:30:07	Almaz AYANA						11	00:12:47.040000	Sileshi SIHINE			11	00:14:20.870000	Vivian Jepkemoi CHERUIYOT
12	02:03:51	Stanley Kipleting BIWOTT			12	02:19:17	Roza Dereje BEKELE						12	2 days, 10:52:00	Patrick Makau MUSYOKI			00:58:52	12	01:05:37	Joan Chelimo MELLY						12	00:26:36.260000	Paul KOECH			12	00:30:07.150000	Werknesh KIDANE						12	00:12:47.530000	Hagos GEBRHIWET			12	00:14:21.290000	Genzebe DIBABA
13	02:03:52	Emmanuel MUTAI			13	02:19:19	Irina MIKITENKO						13	2 days, 10:53:00	Samuel Kamau WANJIRU			00:58:53	13	01:05:50	Mary Jepkosgei KEITANY						13	00:26:37.250000	Zersenay TADESE			13	00:30:07.200000	Yingjie SUN						13	00:12:48.090000	Kenenisa BEKELE			13	00:14:21.970000	Almaz AYANA
14	02:03:58	Wilson Kipsang KIPROTICH			13	02:19:19	Mary Jepkosgei KEITANY						14	2 days, 10:54:00	Stephen KIBET			00:58:54	14	01:05:51	Violah JEPCHUMBA						14	00:26:38.080000	Salah HISSOU			14	00:30:07.780000	Betsy SAINA						14	00:12:48.250000	Kenenisa BEKELE			14	00:14:22.470000	Hellen OBIRI
15	02:03:59	Haile GEBRSELASSIE			15	02:19:25	Gladys CHERONO						14	2 days, 10:54:00	Geoffrey KAMWOROR			00:58:54	15	01:05:52	Edith CHELIMO						15	00:26:38.760000	Ahmad Hassan ABDULLAH			15	00:30:08.060000	Meseret DEFAR						15	00:12:48.640000	Isiah Kiplangat KOECH			15	00:14:22.510000	Vivian Jepkemoi CHERUIYOT
16	02:04:00	Eliud KIPCHOGE			16	02:19:26	Catherine NDEREBA						16	2 days, 10:55:00	Haile GEBRSELASSIE			00:58:55	16	01:06:02	Mary Jepkosgei KEITANY						16	00:26:39.690000	Sileshi SIHINE			16	00:30:11.530000	Florence KIPLAGAT						16	00:12:48.660000	Isaac Kiprono SONGOK			16	00:14:23.460000	Tirunesh DIBABA
16	02:04:00	Mosinet GEREMEW			17	02:19:30	Boru Feyse TADESE						17	2 days, 10:56:00	Patrick Makau MUSYOKI			00:58:56	17	01:06:04	Cynthia JEROTICH						17	00:26:39.770000	Boniface KIPROP			17	00:30:11.870000	Wude AYALEW						17	00:12:48.770000	Yenew ALAMIREW			17	00:14:23.680000	Tirunesh DIBABA
18	02:04:02	Leule GEBRSELASSIE			18	02:19:31	Asselefech MEDESSA MERGIA						17	2 days, 10:56:00	Stanley Kipleting BIWOTT			00:58:56	18	01:06:06	Violah JEPCHUMBA						18	00:26:41.580000	Haile GEBRSELASSIE			18	00:30:12.530000	Lornah KIPLAGAT						18	00:12:48.810000	Saif Saaeed SHAHEEN			18	00:14:23.750000	Liliya SHOBUKHOVA
19	02:04:05	Eliud KIPCHOGE			19	02:19:34	Lucy Kabuu WANGUI						19	2 days, 10:58:00	Sammy KITWARA			00:58:58	19	01:06:07	Gladys CHERONO						19	00:26:41.750000	Samuel Kamau WANJIRU			19	00:30:13.170000	Molly HUDDLE						19	00:12:48.980000	Daniel KOMEN			19	00:14:24.530000	Meseret DEFAR
20	02:04:06	Tamirat TOLA			20	02:19:36	Deena KASTOR						19	2 days, 10:58:00	Geoffrey MUTAI			00:58:58	20	01:06:08	Joyciline JEPKOSGEI						20	00:26:41.950000	Boniface KIPROP			20	00:30:13.370000	Huandi ZHONG						20	00:12:49.040000	Thomas Pkemei LONGOSIWA			20	00:14:24.680000	Elvan ABEYLEGESSE
20	02:04:06	Asefa MENGSTU			20	02:19:36	Yebrgual MELESE						21	2 days, 10:59:00	Zersenay TADESE			00:58:59	21	01:06:09	Lucy Kabuu WANGUI						21	00:26:43.160000	Kenenisa BEKELE			21	00:30:13.740000	Ingrid KRISTIANSEN						21	00:12:49.280000	Brahim LAHLAFI			21	00:14:25.220000	Genzebe DIBABA
22	02:04:08	Sisay LEMMA			22	02:19:39	Yingjie SUN						21	2 days, 10:59:00	Wilson Kipsang KIPROTICH			00:58:59	22	01:06:11	Prisca JEPTOO						22	00:26:43.530000	Haile GEBRSELASSIE			22	00:30:15.670000	Tirunesh DIBABA						22	00:12:49.500000	John KIPKOECH			22	00:14:25.430000	Vivian Jepkemoi CHERUIYOT
23	02:04:11	Eliud KIPCHOGE			23	02:19:41	Yoko SHIBUI						23	2 days, 11:00:00	Jemal Yimer MEKONNEN			00:59:00	22	01:06:11	Eunice Chebichi CHUMBA						23	00:26:43.980000	Lucas Kimeli ROTICH			23	00:30:16.320000	Almaz AYANA						23	00:12:49.530000	Kenenisa BEKELE			23	00:14:25.520000	Meseret DEFAR
23	02:04:11	Tamirat TOLA			23	02:19:41	Tirfi TSEGAYE						24	2 days, 11:01:00	Kenneth Kiprop KIPKEMOI			00:59:01	22	01:06:11	Netsanet GUDETA						24	00:26:44.360000	Galen RUPP			24	00:30:17.150000	Paula RADCLIFFE						24	00:12:49.640000	Haile GEBRSELASSIE			24	00:14:25.780000	Hellen OBIRI
25	02:04:15	Geoffrey MUTAI			25	02:19:44	Florence KIPLAGAT						25	2 days, 11:02:00	Patrick Makau MUSYOKI			00:59:02	25	01:06:14	Debele DEGAFA						25	00:26:46.190000	Kenenisa BEKELE			25	00:30:17.490000	Derartu TULU						25	00:12:49.710000	Mohammed MOURHIT			25	00:14:25.840000	Almaz AYANA
25	02:04:15	Birhanu LEGESE			26	02:19:46	Naoko TAKAHASHI						25	2 days, 11:02:00	Jonathan MAIYO			00:59:02	26	01:06:18	Joyce CHEPKIRUI						26	00:26:46.310000	Kenenisa BEKELE			26	00:30:18.390000	Ejegayehu DIBABA						26	00:12:49.870000	Paul TERGAT			26	00:14:25.880000	Hellen OBIRI
27	02:04:16	Dennis KIMETTO			27	02:19:47	Sarah CHEPCHIRCHIR						27	2 days, 11:05:00	Evans Kiprop CHERUIYOT			00:59:05	27	01:06:19	Ruth CHEPNG'ETICH						27	00:26:46.440000	Paul TERGAT			27	00:30:19.390000	Werknesh KIDANE						27	00:12:50.160000	Sileshi SIHINE			27	00:14:26.170000	Vivian Jepkemoi CHERUIYOT
28	02:04:23	Ayele ABSHERO			28	02:19:50	Edna Ngeringwony KIPLAGAT						27	2 days, 11:05:00	Ezekiel CHEBII			00:59:05	28	01:06:25	Lornah KIPLAGAT						28	00:26:46.570000	Mo FARAH			28	00:30:20.750000	Tirunesh DIBABA						28	00:12:50.180000	Kenenisa BEKELE			28	00:14:26.830000	Almaz AYANA
29	02:04:24	Tesfaye ABERA			29	02:19:51	Chunxiu ZHOU						29	2 days, 11:06:00	Geoffrey MUTAI			00:59:06	28	01:06:25	Joan Chelimo MELLY						29	00:26:47.890000	Paul KOECH			29	00:30:21.670000	Elvan ABEYLEGESSE						29	00:12:50.220000	Eliud KIPCHOGE			29	00:14:26.900000	Meseret DEFAR
30	02:04:26	Haile GEBRSELASSIE			29	02:19:51	Birhane DIBABA						29	2 days, 11:06:00	Guye Idemo ADOLA			00:59:06	30	01:06:26	Genet YALEW						30	00:26:48	Galen RUPP			30	00:30:22.220000	Shalane FLANAGAN						30	00:12:50.240000	Hicham EL GUERROUJ			30	00:14:27.410000	Vivian Jepkemoi CHERUIYOT
31	02:04:27	Duncan KIBET			31	02:19:52	Mare DIBABA						29	2 days, 11:06:00	Alex KIBET			00:59:06	31	01:06:27	Rita Jeptoo SITIENEI						31	00:26:48.350000	Imane MERGA			31	00:30:22.480000	Gete WAMI						31	00:12:50.250000	Abderrahim GOUMRI			31	00:14:27.550000	Caroline Chepkoech KIPKIRUI
31	02:04:27	James Kipsang KWAMBAI			31	02:19:52	Mare DIBABA						32	2 days, 11:07:00	Paul Malakwen KOSGEI			00:59:07	32	01:06:28	Mamitu DASKA						32	00:26:48.730000	Sileshi SIHINE			32	00:30:22.880000	Fernanda RIBEIRO						32	00:12:50.380000	Eliud KIPCHOGE			32	00:14:28.090000	Jiang BO
33	02:04:28	Sammy KITWARA			33	02:19:53	Debele DEGAFA						32	2 days, 11:07:00	Geoffrey KAMWOROR			00:59:07	33	01:06:29	Mary WACERA						33	00:26:48.990000	Josphat Kipkoech BETT			33	00:30:23.070000	Alla ZHILYAYEVA						33	00:12:50.550000	MoGES Ndiema MASAI			33	00:14:28.390000	Sentayehu EJIGU
34	02:04:29	Wilson Kipsang KIPROTICH			34	02:19:55	Catherine NDEREBA						32	2 days, 11:07:00	James WANGARI			00:59:07	34	01:06:35	Brigid JEPCHESCHIR KOSGEI						34	00:26:49.020000	Eliud KIPCHOGE			34	00:30:23.250000	Ingrid KRISTIANSEN						34	00:12:50.720000	MoGES Ndiema KIPSIRO			34	00:14:28.880000	Genzebe DIBABA
35	02:04:32	Tsegaye MEKONNEN			35	02:19:57	Rita Jeptoo SITIENEI						35	2 days, 11:08:00	Jonathan MAIYO			00:59:08	35	01:06:36	Mary Jepkosgei KEITANY						35	00:26:49.200000	MoGES Ndiema MASAI			35	00:30:24.020000	Tirunesh DIBABA						35	00:12:50.800000	Salah HISSOU			35	00:14:28.980000	Meseret DEFAR
35	02:04:32	Dickson CHUMBA			36	02:20:02	Asselefech MEDESSA MERGIA						35	2 days, 11:08:00	Geoffrey KAMWOROR			00:59:08	36	01:06:38	Gladys CHERONO						36	00:26:49.380000	Sammy KIPKETER			36	00:30:24.360000	Huina XING						36	00:12:50.860000	Ali SAIDI-SIEF			36	00:14:29.110000	Paula RADCLIFFE
37	02:04:33	Hayle LEMI			37	02:20:03	Gladys CHERONO						37	2 days, 11:09:00	James Kipsang KWAMBAI			00:59:09	36	01:06:38	Mary Jepkosgei KEITANY						37	00:26:49.410000	Paul Kipngetich TANUI			37	00:30:24.390000	Tirunesh DIBABA						37	00:12:51	Joseph EBUYA			37	00:14:29.190000	Almaz AYANA
38	02:04:38	Tsegaye KEBEDE			38	02:20:13	Haftamnesh TESFAYE						38	2 days, 11:10:00	Bernard Kiprop KIPYEGO			00:59:10	38	01:06:39	Peres JEPCHIRCHIR						38	00:26:49.510000	Mo FARAH			38	00:30:24.560000	Gete WAMI						38	00:12:51.210000	Eliud KIPCHOGE			38	00:14:29.320000	Olga YEGOROVA
39	02:04:40	Emmanuel MUTAI			39	02:20:14	Prisca JEPTOO						38	2 days, 11:10:00	Bernard Kiprop KOECH			00:59:10	38	01:06:39	Ruti AGA						39	00:26:49.550000	MoGES MOSOP			39	00:30:24.850000	Florence KIPLAGAT						39	00:12:51.320000	Kenenisa BEKELE			38	00:14:29.320000	Berhane ADERE
40	02:04:42	Eliud KIPCHOGE			40	02:20:15	Prisca JEPTOO						38	2 days, 11:10:00	Abraham CHEROBEN			00:59:10	40	01:06:40	Ingrid KRISTIANSEN						40	00:26:49.570000	Kenenisa BEKELE			40	00:30:24.980000	Ejegayehu DIBABA						40	00:12:51.340000	Edwin Cheruiyot SOI			40	00:14:29.500000	Viola Jelagat KIBIWOT
41	02:04:44	Wilson Kipsang KIPROTICH			41	02:20:18	Tirfi TSEGAYE						38	2 days, 11:10:00	Geoffrey KAMWOROR			00:59:10	41	01:06:41	Cynthia JEROTICH						41	00:26:49.900000	Assefa MEZGEBU			41	00:30:25.410000	Berhane ADERE						41	00:12:51.440000	Kenenisa BEKELE			41	00:14:29.520000	Meseret DEFAR
41	02:04:44	Seyefu TURA			42	02:20:21	Edna Ngeringwony KIPLAGAT						38	2 days, 11:10:00	Bitan KAROKI			00:59:10	42	01:06:43	Jemima Jelagat SUMGONG						42	00:26:49.940000	Joshua CHEPTEGEI			42	00:30:26	Ejegayehu DIBABA						42	00:12:51.450000	Vincent Kiprop CHEPKOK			42	00:14:29.770000	Hellen OBIRI
43	02:04:45	Lelisa DESISA			42	02:20:21	Lucy Kabuu WANGUI						43	2 days, 11:11:00	Kenneth Kiprop KIPKEMOI			00:59:11	43	01:06:44	Elana MEYER						43	00:26:50.120000	Zersenay TADESE			43	00:30:26.200000	Galina BOGOMOLOVA						43	00:12:51.600000	Daniel KOMEN			43	00:14:29.820000	Yanmei DONG
44	02:04:46	Tsegaye MEKONNEN			44	02:20:22	Brigid JEPCHESCHIR KOSGEI						43	2 days, 11:11:00	Mosinet GEREMEW			00:59:11	44	01:06:46	Eunice Jepkirui KIRWA						44	00:26:50.200000	Richard LIMO			44	00:30:26.370000	Sally KIPYEGO						44	00:12:51.950000	Thomas Pkemei LONGOSIWA			43	00:14:29.820000	Senbere TEFERI
45	02:04:47	Wilson Kipsang KIPROTICH			45	02:20:23	Gladys CHERONO						43	2 days, 11:11:00	Abraham CHEROBEN			00:59:11	44	01:06:46	Joyciline JEPKOSGEI						45	00:26:50.530000	Sileshi SIHINE			45	00:30:26.410000	Yasemin CAN						45	00:12:51.960000	Albert ROP			45	00:14:30.100000	Vivian Jepkemoi CHERUIYOT
46	02:04:48	Patrick Makau MUSYOKI			46	02:20:24	Florence KIPLAGAT						46	2 days, 11:12:00	Atsedu TSEGAY			00:59:12	46	01:06:47	Paula RADCLIFFE						46	00:26:50.600000	Paul Kipngetich TANUI			46	00:30:26.420000	Derartu TULU						46	00:12:51.980000	Saif Saaeed SHAHEEN			46	00:14:30.180000	Meseret DEFAR
46	02:04:48	Yemane ADHANE TSEGAY			47	02:20:27	Boru Feyse TADESE						46	2 days, 11:12:00	Cyprian KIMURGOR			00:59:12	46	01:06:47	Degitu AZMERAW						47	00:26:50.630000	Paul Kipngetich TANUI			47	00:30:26.500000	Linet Chepkwemoi MASAI						47	00:12:52.260000	Kenenisa BEKELE			47	00:14:30.400000	Tirunesh DIBABA
46	02:04:48	Berhanu SHIFERAW			48	02:20:30	Bezunesh BEKELE						46	2 days, 11:12:00	James WANGARI			00:59:12	48	01:06:48	Mary Jepkosgei KEITANY						48	00:26:50.670000	Ahmad Hassan ABDULLAH			48	00:30:26.660000	Gelete BURKA						48	00:12:52.290000	Isaac Kiprono SONGOK			48	00:14:30.420000	Sally KIPYEGO
49	02:04:49	Tadesse TOLA			48	02:20:30	Aberu KEBEDE						49	2 days, 11:13:00	Patrick Makau MUSYOKI			00:59:13	48	01:06:48	Gladys CHERONO						49	00:26:50.770000	Haile GEBRSELASSIE			49	00:30:26.670000	Tirunesh DIBABA						49	00:12:52.320000	Kenenisa BEKELE			49	00:14:30.630000	Tirunesh DIBABA
50	02:04:50	Dino SEFIR			50	02:20:33	Aberu KEBEDE						49	2 days, 11:13:00	Evans Kiprop CHERUIYOT			00:59:13	48	01:06:48	Caroline Chepkoech KIPKIRUI						50	00:26:50.970000	Mo FARAH			50	00:30:26.700000	Belaynesh OLJIRA						50	00:12:52.330000	Sammy KIPKETER			50	00:14:30.880000	Gete WAMI
										SES	SES SD													SES	SES SD												SES	SES SD
MTSm 1-50	02:04:10.840000				MTSw 1-50	02:19:30.220000				89.0161	0.211995						MTSm 1-50	00:58:59.500000	MTSw 1-50	01:06:07.360000				89.2155	0.537168		MTSm 1-50	00:26:42.153000				MTSw 1-50	00:30:13.108000				88.365	0.211683		MTSm 1-50	00:12:48.727000				MTSw 1-50	00:14:24.727000
MTSm 1-10	02:03:21.100000				MTSw 1-10	02:17:55.100000				89.4382							MTSm 1-10	00:58:40.600000	MTSw 1-10	01:05:03.900000				90.1816			MTSm 1-10	00:26:26.444000				MTSw 1-10	00:29:47.076000				88.7732			MTSm 1-10	00:12:42.621000				MTSw 1-10	00:14:15.631000
MTSm 11-20	02:03:57.900000				MTSw 11-20	02:19:24.900000				88.918							MTSm 11-20	00:58:54.700000	MTSw 11-20	01:05:55.300000				89.3662			MTSm 11-20	00:26:39.072000				MTSw 11-20	00:30:09.966000				88.3482			MTSm 11-20	00:12:48.381000				MTSw 11-20	00:14:22.921000
MTSm 21-30	02:04:15.500000				MTSw 21-30	02:19:44.600000				88.919							MTSm 21-30	00:59:02.500000	MTSw 21-30	01:06:16.900000				89.0769			MTSm 21-30	00:26:45.643000				MTSw 21-30	00:30:18.279000				88.3056			MTSm 21-30	00:12:49.833000				MTSw 21-30	00:14:26.098000
MTSm 31-40	02:04:32.800000				MTSw 31-40	02:20:01.600000				88.945							MTSm 31-40	00:59:08.200000	MTSw 31-40	01:06:34.900000				88.8182			MTSm 31-40	00:26:49.171000				MTSw 31-40	00:30:23.884000				88.2277			MTSm 31-40	00:12:50.843000				MTSw 31-40	00:14:28.833000
MTSm 41-50	02:04:46.900000				MTSw 41-50	02:20:24.900000				88.8663							MTSm 41-50	00:59:11.500000	MTSw 41-50	01:06:45.800000				88.6589			MTSm 41-50	00:26:50.433000				MTSw 41-50	00:30:26.334000				88.1784			MTSm 41-50	00:12:51.958000				MTSw 41-50	00:14:30.154000
[truncated: 91 more columns]

## Sheet: SES Raw Data (athletes)
Marathon													Half-Marathon														10 k													5 k
Rank	Mark	Competitor (Female)		Country	Rank	Mark	Competitor (Male)		Country	SES (MARATHON)			Rank	Mark (mm:ss:00)	Competitor (Female)		Country	Mark (mm:ss)	Rank	Competitor (Male)		Country	MARK	SES (HALF MARATHON)			Rank	Mark	Competitor (Male)		Country	Rank	Mark	Competitor (Female)		Country	SES (10KM OUTDOOR)			Rank	Mark	Competitor (Male)		Country	Rank	Mark	Competitor (Female)		Country
1	02:02:57	Dennis KIMETTO			1	02:15:25	Paula RADCLIFFE						1	2 days, 10:23:00	Zersenay TADESE			0:58:23	1	01:04:51	Joyciline JEPKOSGEI						1	00:26:17.530000	Kenenisa BEKELE			1	00:29:17.450000	Almaz AYANA						1	00:12:37.350000	Kenenisa BEKELE			1	00:14:11.150000	Tirunesh DIBABA
2	02:03:03	Kenenisa BEKELE			2	02:17:01	Mary Jepkosgei KEITANY						2	2 days, 10:33:00	Samuel Kamau WANJIRU			0:58:33	2	01:04:52	Fancy CHEMUTAI						2	00:26:22.750000	Haile GEBRSELASSIE			2	00:29:31.780000	Junxia WANG						2	00:12:39.360000	Haile GEBRSELASSIE			2	00:14:12.590000	Almaz AYANA
3	02:03:05	Eliud KIPCHOGE			3	02:17:56	Tirunesh DIBABA						3	2 days, 10:40:00	Abraham CHEROBEN			0:58:40	3	01:04:55	Mary Jepkosgei KEITANY						3	00:26:27.850000	Paul TERGAT			3	00:29:32.530000	Vivian Jepkemoi CHERUIYOT						3	00:12:39.740000	Daniel KOMEN			3	00:14:12.880000	Meseret DEFAR
4	02:03:13	Emmanuel MUTAI			4	02:18:31	Vivian Jepkemoi CHERUIYOT						4	2 days, 10:42:00	Bedan KAROKI			0:58:42	4	01:05:04	Joan Chelimo MELLY						4	00:26:30.030000	Nicholas KEMBOI			4	00:29:42.560000	Tirunesh DIBABA						4	00:12:46.530000	Eliud KIPCHOGE			4	00:14:15.410000	Genzebe DIBABA
4	02:03:13	Wilson Kipsang KIPROTICH			5	02:18:47	Catherine NDEREBA						4	2 days, 10:42:00	Eric KIPTANUI			0:58:42	5	01:05:06	Peres JEPCHIRCHIR						5	00:26:30.740000	Abebe DINKESA			5	00:29:53.510000	Alice Aprot NAWOWUNA						5	00:12:46.810000	Dejen GEBREMESKEL			5	00:14:18.370000	Hellen OBIRI
6	02:03:38	Patrick Makau MUSYOKI			6	02:18:58	Tiki GELANA						6	2 days, 10:46:00	Matthew Kipkoech KISORIO			0:58:46	6	01:05:07	Caroline Chepkoech KIPKIRUI						6	00:26:35.630000	Micah Kemboi KOGO			6	00:29:53.800000	Meselech MELKAMU						6	00:12:47.040000	Sileshi SIHINE			6	00:14:20.870000	Vivian Jepkemoi CHERUIYOT
7	02:03:46	Guye Idemo ADOLA			7	02:19:12	Mizuki NOGUCHI						7	2 days, 10:47:00	Atsedu TSEGAY			0:58:47	7	01:05:09	Florence KIPLAGAT						7	00:26:36.260000	Paul KOECH			7	00:29:59.200000	Meseret DEFAR						7	00:12:47.530000	Hagos GEBRHIWET			7	00:14:23.750000	Liliya SHOBUKHOVA
8	02:03:51	Stanley Kipleting BIWOTT			8	02:19:17	Roza DEREJE						8	2 days, 10:48:00	Sammy KITWARA			0:58:48	8	01:05:22	Violah JEPCHUMBA						8	00:26:37.250000	Zersenay TADESE			8	00:30:01.090000	Paula RADCLIFFE						8	00:12:48.640000	Isiah Kiplangat KOECH			8	00:14:24.680000	Elvan ABEYLEGESSE
9	02:03:59	Haile GEBRSELASSIE			9	02:19:19	Irina MIKITENKO						8	2 days, 10:48:00	Jorum OKOMBO			0:58:48	9	01:05:52	Edith CHELIMO						9	00:26:38.080000	Salah HISSOU			9	00:30:04.180000	Berhane ADERE						9	00:12:48.660000	Isaac Kiprono SONGOK			9	00:14:27.550000	Caroline Chepkoech KIPKIRUI
10	02:04:00	Mosinet GEREMEW			10	02:19:25	Gladys CHERONO						10	2 days, 10:51:00	Alex KORIO			0:58:51	10	01:06:04	Cynthia JEROTICH						10	00:26:38.760000	Ahmad Hassan ABDULLAH			10	00:30:07.150000	Werknesh KIDANE						10	00:12:48.770000	Yenew ALAMIREW			10	00:14:28.090000	Jiang BO
11	02:04:02	Leule GEBRSELASSIE			11	02:19:30	Boru Feyse TADESE						11	2 days, 10:52:00	Patrick Makau MUSYOKI			0:58:52	11	01:06:07	Gladys CHERONO						11	00:26:39.690000	Sileshi SIHINE			11	00:30:07.200000	Yingjie SUN						11	00:12:48.810000	Saif Saaeed SHAHEEN			11	00:14:28.390000	Sentayehu EJIGU
12	02:04:06	Tamirat TOLA			12	02:19:31	Asselefech MEDESSA MERGIA						12	2 days, 10:54:00	Stephen KIBET			0:58:54	12	01:06:09	Lucy Kabuu WANGUI						12	00:26:39.770000	Boniface KIPROP			12	00:30:07.780000	Betsy SAINA						12	00:12:49.040000	Thomas Pkemei LONGOSIWA			12	00:14:29.110000	Paula RADCLIFFE
12	02:04:06	Asefa MENGSTU			13	02:19:34	Lucy Kabuu WANGUI						12	2 days, 10:54:00	Geoffrey KAMWOROR			0:58:54	13	01:06:11	Prisca JEPTOO						13	00:26:41.750000	Samuel Kamau WANJIRU			13	00:30:11.530000	Florence KIPLAGAT						13	00:12:49.280000	Brahim LAHLAFI			13	00:14:29.320000	Olga YEGOROVA
14	02:04:08	Sisay LEMMA			14	02:19:36	Deena KASTOR						14	2 days, 10:55:00	Haile GEBRSELASSIE			0:58:55	13	01:06:11	Eunice Chebichii CHUMBA						14	00:26:43.980000	Lucas Kimeli ROTICH			14	00:30:11.870000	Wude AYALEW						14	00:12:49.500000	John KIPKOECH			13	00:14:29.320000	Berhane ADERE
15	02:04:15	Geoffrey MUTAI			14	02:19:36	Yebrgual MELESE						15	2 days, 10:56:00	Stanley Kipleting BIWOTT			0:58:56	13	01:06:11	Netsanet GUDETA						15	00:26:44.360000	Galen RUPP			15	00:30:12.530000	Lornah KIPLAGAT						15	00:12:49.710000	Mohammed MOURHIT			15	00:14:29.500000	Viola Jelagat KIBIWOT
15	02:04:15	Birhanu LEGESE			16	02:19:39	Yingjie SUN						16	2 days, 10:58:00	Geoffrey MUTAI			0:58:58	16	01:06:14	Worknesh DEGEFA						16	00:26:46.570000	Mo FARAH			16	00:30:13.170000	Molly HUDDLE						16	00:12:49.870000	Paul TERGAT			16	00:14:29.820000	Yanmei DONG
17	02:04:23	Ayele ABSHERO			17	02:19:41	Yoko SHIBUI						17	2 days, 10:59:00	Wilson Kipsang KIPROTICH			0:58:59	17	01:06:18	Joyce CHEPKIRUI						17	00:26:48.350000	Imane MERGA			17	00:30:13.370000	Huandi ZHONG						17	00:12:50.240000	Hicham EL GUERROUJ			16	00:14:29.820000	Senbere TEFERI
18	02:04:24	Tesfaye ABERA			17	02:19:41	Tirfi TSEGAYE						18	2 days, 11:00:00	Jemal Yimer MEKONNEN			0:59:00	18	01:06:19	Ruth CHEPNG'ETICH						18	00:26:48.990000	Josphat Kipkoech BETT			18	00:30:13.740000	Ingrid KRISTIANSEN						18	00:12:50.250000	Abderrahim GOUMRI			18	00:14:30.420000	Sally KIPYEGO
19	02:04:27	Duncan KIBET			19	02:19:44	Florence KIPLAGAT						19	2 days, 11:01:00	Kenneth Kiprop KIPKEMOI			0:59:01	19	01:06:22	Ababel YESHANEH						19	00:26:49.020000	Eliud KIPCHOGE			19	00:30:17.490000	Derartu TULU						19	00:12:50.550000	Moses Ndiema MASAI			19	00:14:30.880000	Gete WAMI
19	02:04:27	James Kipsang KWAMBAI			20	02:19:46	Naoko TAKAHASHI						20	2 days, 11:02:00	Jonathan MAIYO			0:59:02	20	01:06:25	Lornah KIPLAGAT						20	00:26:49.200000	Moses Ndiema MASAI			20	00:30:18.390000	Ejegayehu DIBABA						20	00:12:50.720000	Moses Ndiema KIPSIRO			20	00:14:31.140000	Linet Chepkwemoi MASAI
21	02:04:28	Sammy KITWARA			21	02:19:47	Sarah CHEPCHIRCHIR						21	2 days, 11:05:00	Evans Kiprop CHERUIYOT			0:59:05	21	01:06:26	Genet YALEW						21	00:26:49.380000	Sammy KIPKETER			21	00:30:21.670000	Elvan ABEYLEGESSE						21	00:12:50.800000	Salah HISSOU			21	00:14:31.200000	Gelete BURKA
22	02:04:32	Tsegaye MEKONNEN			22	02:19:50	Edna Ngeringwony KIPLAGAT						21	2 days, 11:05:00	Ezekiel CHEBII			0:59:05	22	01:06:27	Rita Jeptoo SITIENEI						22	00:26:49.410000	Paul Kipngetich TANUI			22	00:30:22.220000	Shalane FLANAGAN						22	00:12:50.860000	Ali SAIDI-SIEF			22	00:14:31.480000	Gabriela SZABO
22	02:04:32	Dickson CHUMBA			23	02:19:51	Chunxiu ZHOU						23	2 days, 11:06:00	Guye Idemo ADOLA			0:59:06	23	01:06:28	Mamitu DASKA						23	00:26:49.550000	Moses MOSOP			23	00:30:22.480000	Gete WAMI						23	00:12:51	Joseph EBUYA			23	00:14:31.910000	Meselech MELKAMU
24	02:04:33	Hayle LEMI			23	02:19:51	Birhane DIBABA						23	2 days, 11:06:00	Alex KIBET			0:59:06	24	01:06:29	Mary WACERA						24	00:26:49.900000	Assefa MEZGEBU			24	00:30:22.880000	Fernanda RIBEIRO						24	00:12:51.340000	Edwin Cheruiyot SOI			23	00:14:31.910000	Sylvia Jebiwot KIBET
25	02:04:38	Tsegaye KEBEDE			25	02:19:52	Mare DIBABA						23	2 days, 11:06:00	Daniel KIPCHUMBA			0:59:06	25	01:06:35	Brigid KOSGEI						25	00:26:49.940000	Joshua CHEPTEGEI			25	00:30:23.070000	Alla ZHILYAYEVA						25	00:12:51.450000	Vincent Kiprop CHEPKOK			25	00:14:31.950000	Faith KIPYEGON
26	02:04:44	Seifu TURA			26	02:19:53	Worknesh DEGEFA						26	2 days, 11:07:00	Paul Malakwen KOSGEI			0:59:07	26	01:06:39	Ruti AGA						26	00:26:50.200000	Richard LIMO			26	00:30:24.360000	Huina XING						26	00:12:51.960000	Albert ROP			26	00:14:32.080000	Zahra OUAZIZ
27	02:04:45	Lelisa DESISA			27	02:19:57	Rita Jeptoo SITIENEI						26	2 days, 11:07:00	James WANGARI			0:59:07	27	01:06:40	Ingrid KRISTIANSEN						27	00:26:51.020000	Dejen GEBREMESKEL			27	00:30:26.200000	Galina BOGOMOLOVA						27	00:12:52.330000	Sammy KIPKETER			27	00:14:32.330000	Shixiang LIU
28	02:04:48	Yemane TSEGAY			28	02:20:13	Haftamnesh TESFAYE						26	2 days, 11:07:00	Mang'ata Kimai NDIWA			0:59:07	28	01:06:43	Jemima Jelagat SUMGONG						28	00:26:51.110000	Yigrem DEMELASH			28	00:30:26.370000	Sally KIPYEGO						28	00:12:52.450000	Tariku BEKELE			28	00:14:32.740000	Ejegayehu DIBABA
28	02:04:48	Berhanu SHIFERAW			28	02:20:13	Brigid KOSGEI						29	2 days, 11:09:00	James Kipsang KWAMBAI			0:59:09	29	01:06:44	Elana MEYER						29	00:26:51.160000	Emmanuel Kipkemei BETT			29	00:30:26.410000	Yasemin CAN						29	00:12:52.800000	Gebregziabher GEBREMARIAM			29	00:14:32.820000	Margaret Chelimo KIPKEMBOI
30	02:04:49	Tadesse TOLA			30	02:20:14	Prisca JEPTOO						30	2 days, 11:10:00	Bernard Kiprop KIPYEGO			0:59:10	30	01:06:46	Eunice Jepkirui KIRWA						30	00:26:51.490000	Charles Waweru KAMATHI			30	00:30:26.500000	Linet Chepkwemoi MASAI						30	00:12:52.990000	Abraham CHEBII			30	00:14:33.040000	Werknesh KIDANE
30	02:04:49	Tola SHURA KITATA			31	02:20:30	Bezunesh BEKELE						30	2 days, 11:10:00	Bernard Kiprop KOECH			0:59:10	31	01:06:47	Paula RADCLIFFE						31	00:26:51.680000	Vincent Kiprop CHEPKOK			31	00:30:26.660000	Gelete BURKA						31	00:12:53.110000	Mo FARAH			31	00:14:33.090000	Agnes Jebet TIROP
32	02:04:50	Dino SEFIR			31	02:20:30	Aberu KEBEDE						32	2 days, 11:11:00	Mosinet GEREMEW			0:59:11	31	01:06:47	Degitu AZIMERAW						32	00:26:52.120000	Bedan KAROKI			32	00:30:26.700000	Belaynesh OLJIRA						32	00:12:53.410000	Khalid BOULAMI			32	00:14:33.130000	Gulnara SAMITOVA-GALKINA
32	02:04:50	Getu FELEKE			33	02:20:41	Ruti AGA						33	2 days, 11:12:00	CyBrian KOTUT			0:59:12	33	01:06:49	Esther Wanjiru MAINA						33	00:26:52.230000	William SIGEI			33	00:30:29.230000	Gladys CHERONO						33	00:12:53.460000	Mark Kosgei KIPTOO			33	00:14:33.300000	Etenesh DIRO
34	02:04:52	Feyisa LILESA			34	02:20:42	Berhane ADERE						34	2 days, 11:14:00	Dennis KIMETTO			0:59:14	34	01:06:50	Tirunesh DIBABA						34	00:26:52.300000	Mohammed MOURHIT			34	00:30:29.360000	Liliya SHOBUKHOVA						34	00:12:53.580000	Imane MERGA			34	00:14:33.320000	Letesenbet GIDEY
34	02:04:52	Endeshaw NEGESSE			35	02:20:43	Tegla LOROUPE						34	2 days, 11:14:00	Leonard Patrick KOMON			0:59:14	34	01:06:50	Buze DIRIBA						35	00:26:52.330000	Gebregziabher GEBREMARIAM			35	00:30:30.260000	Edith MASAI						35	00:12:53.600000	Bernard LAGAT			35	00:14:33.490000	Lucy Kabuu WANGUI
36	02:04:53	Bernard Kiprop KOECH			36	02:20:45	Gelete BURKA						34	2 days, 11:14:00	Barselius KIPYEGO			0:59:14	36	01:06:56	Meseret Hailu DEBELE						36	00:26:52.650000	Kenneth Kiprop KIPKEMOI			36	00:30:31.030000	Mariya KONOVALOVA						36	00:12:53.660000	Augustine Kiprono CHOGE			36	00:14:33.840000	Edith MASAI
37	02:04:54	Markos GENETI			37	02:20:47	Galina BOGOMOLOVA						37	2 days, 11:15:00	Deriba Merga EJIGU			0:59:15	36	01:06:56	Pauline KAMULU						36	00:26:52.650000	Geoffrey KAMWOROR			37	00:30:31.420000	Inga ABITOVA						37	00:12:53.720000	Philip MOSIMA			37	00:14:33.950000	Mercy CHERONO
38	02:04:55	Paul TERGAT			38	02:20:48	Jemima Jelagat SUMGONG						37	2 days, 11:15:00	Wilson Kwambai CHEBET			0:59:15	38	01:06:57	Gladys CHESIR						38	00:26:52.850000	Abera KUMA			38	00:30:32.030000	Tegla LOROUPE						38	00:12:53.840000	Assefa MEZGEBU			38	00:14:35.300000	Priscah Jepleting CHERONO
39	02:04:56	Sammy Kipchoge KORIR			38	02:20:48	Amane Beriso SHANKULE						37	2 days, 11:15:00	Wilson KIPROP			0:59:15	39	01:07:00	Roza DEREJE						39	00:26:52.870000	John Cheruiyot KORIR			39	00:30:32.360000	Susanne WIGENE						39	00:12:53.980000	Yomif KEJELCHA			39	00:14:36.450000	Fernanda RIBEIRO
39	02:04:56	Jonathan MAIYO			40	02:20:53	Valary JEMELI						40	2 days, 11:17:00	Paul TERGAT			0:59:17	40	01:07:07	Elvan ABEYLEGESSE						40	00:26:52.930000	Mark Kipkinyor BETT			40	00:30:32.720000	Lidiya GRIGORYEVA						40	00:12:54.070000	John Kemboi KIBOWEN			40	00:14:36.520000	Mariem ALAOUI SELSOULI
41	02:05:03	Moses MOSOP			41	02:20:55	Purity Cherotich RIONORIPO						41	2 days, 11:18:00	Leule GEBRSELASSIE			0:59:18	41	01:07:08	Sharon Jemutai CHEROP						41	00:26:54.250000	Matthew Kipkoech KISORIO			41	00:30:35.540000	Kimberley SMITH						41	00:12:54.150000	Dejene BIRHANU			41	00:14:36.800000	Lilian Kasait RENGERUK
42	02:05:04	Abel KIRUI			42	02:20:57	Jordan HASAY						42	2 days, 11:19:00	Tilahun REGASSA			0:59:19	42	01:07:11	Kimberley SMITH						42	00:26:54.610000	Stephen SAMBU			42	00:30:35.910000	Ababel YESHANEH						42	00:12:54.190000	Abraham CHERKOS			42	00:14:36.820000	Yasemin CAN
43	02:05:09	Lawrence CHERONO			43	02:20:59	Shure DEMISE WARE						42	2 days, 11:19:00	Yigrem DEMELASH			0:59:19	43	01:07:12	Almaz AYANA						43	00:26:54.640000	Mark Kosgei KIPTOO			43	00:30:36.750000	Netsanet GUDETA						43	00:12:54.460000	Moses MOSOP			43	00:14:37.070000	Jessica AUGUSTO
44	02:05:10	Samuel Kamau WANJIRU			43	02:20:59	Agnes Jeruto KIPROTICH						42	2 days, 11:19:00	Josphat BOIT			0:59:19	44	01:07:13	Mare DIBABA						44	00:26:54.660000	William Malel SITONIK			44	00:30:37.380000	Genet YALEW						44	00:12:54.580000	James Kwalia C'KURUI			44	00:14:37.330000	Ingrid KRISTIANSEN
45	02:05:13	Vincent KIPRUTO			45	02:21:01	Meselech MELKAMU						45	2 days, 11:20:00	Moses MOSOP			0:59:20	45	01:07:16	Edith MASAI						45	00:26:55.290000	Leonard Patrick KOMON			45	00:30:37.680000	Benita WILLIS-JOHNSON						45	00:12:54.700000	Dieter BAUMANN			45	00:14:38.090000	Mariya KONOVALOVA
45	02:05:13	Wilson Loyanae ERUPE			46	02:21:06	Ingrid KRISTIANSEN						45	2 days, 11:20:00	Birhanu LEGESE			0:59:20	46	01:07:17	Paskalia Chepkorir KIPKOECH						46	00:26:55.730000	Geoffrey KIRUI			46	00:30:38.090000	Yanmei DONG						46	00:12:54.830000	Muktar EDRIS			46	00:14:38.210000	Isabella OCHICHI
45	02:05:13	Nobert KIGEN			47	02:21:09	Meseret Hailu DEBELE						45	2 days, 11:20:00	Daniel KINYUA			0:59:20	47	01:07:18	Dire TUNE						47	00:26:56.110000	Jemal Yimer MEKONNEN			47	00:30:38.330000	Mestawat TUFA						47	00:12:54.850000	Moses KIPTANUI			47	00:14:38.440000	Wude AYALEW
48	02:05:15	Martin Kiptolo LEL			48	02:21:14	Shalane FLANAGAN						48	2 days, 11:21:00	Tesfamriam Samuel TSEGAY			0:59:21	48	01:07:21	Asselefech MEDESSA MERGIA						48	00:26:56.740000	Josphat Kiprono MENJO			48	00:30:38.780000	Jelena PROKOPČUKA						48	00:12:54.990000	Benjamin LIMO			48	00:14:38.700000	Janet KISA
49	02:05:16	Levi Omari MATEBO			49	02:21:17	Eunice Jepkirui KIRWA						49	2 days, 11:22:00	Feyisa LILESA			0:59:22	49	01:07:22	Nancy Jepkosgei KIPROP						49	00:26:57.330000	Tamirat TOLA			49	00:30:39.410000	Lixin LAN						49	00:12:55.060000	Lucas Kimeli ROTICH			49	00:14:38.920000	Shannon ROWBURY
50	02:05:21	Eliud KIPTANUI			50	02:21:21	Joan BENOIT-SAMUELSON						49	2 days, 11:22:00	Peter Cheruiyot KIRUI			0:59:22	50	01:07:23	Margaret OKAYO						50	00:26:57.360000	Josphat Muchiri NDAMBIRI			50	00:30:39.960000	Lucy Kabuu WANGUI						50	00:12:55.520000	Hicham BELLANI			50	00:14:39.190000	Ines CHENONGE
										SES	SES SD													SES	SES SD												SES	SES SD
MTSm 1-50	02:04:29.580000				MTSw 1-50	02:19:57.500000				88.95	0.189689						MTSm 1-50	0:59:03.920000	MTSw 1-50	1:06:26.920000				88.8887	0.601756		MTSm 1-50	00:26:47.021000				MTSw 1-50	00:30:18.642000				88.3638	0.376484		MTSm 1-50	00:12:51.003000				MTSw 1-50	00:14:30.730000
MTSm 1-10	02:03:28.500000				MTSw 1-10	02:18:23.100000				89.2257							MTSm 1-10	0:58:42	MTSw 1-10	1:05:14.200000				89.9801			MTSm 1-10	00:26:31.488000				MTSw 1-10	00:29:48.325000				88.9932			MTSm 1-10	00:12:45.043000				MTSw 1-10	00:14:19.534000
MTSm 11-20	02:04:15.300000				MTSw 11-20	02:19:37.800000				88.9888							MTSm 11-20	0:58:57.100000	MTSw 11-20	1:06:14.700000				88.9904			MTSm 11-20	00:26:45.168000				MTSw 11-20	00:30:12.707000				88.5509			MTSm 11-20	00:12:49.797000				MTSw 11-20	00:14:29.772000
MTSm 21-30	02:04:39.700000				MTSw 21-30	02:19:58.100000				89.0642							MTSm 21-30	0:59:06.800000	MTSw 21-30	1:06:35.700000				88.7654			MTSm 21-30	00:26:50.316000				MTSw 21-30	00:30:24.216000				88.2744			MTSm 21-30	00:12:51.798000				MTSw 21-30	00:14:32.146000
MTSm 31-40	02:04:52.700000				MTSw 31-40	02:20:42.700000				88.7477							MTSm 31-40	0:59:13.700000	MTSw 31-40	1:06:53.900000				88.5348			MTSm 31-40	00:26:52.461000				MTSw 31-40	00:30:30.177000				88.1041			MTSm 31-40	00:12:53.643000				MTSw 31-40	00:14:34.239000
MTSm 41-50	02:05:11.700000				MTSw 41-50	02:21:05.800000				88.7299							MTSm 41-50	0:59:20	MTSw 41-50	1:07:16.100000				88.204			MTSm 41-50	00:26:55.672000				MTSw 41-50	00:30:37.783000				87.9142			MTSm 41-50	00:12:54.733000				MTSw 41-50	00:14:37.957000
[truncated: 90 more columns]

## Sheet: SES Box Plot
Records
Event Category	Event	Sex Equity Score
Long Distance	Marathon	89.0161
Long Distance	Marathon	89.4382
Long Distance	Marathon	88.918
Long Distance	Marathon	88.919
Long Distance	Marathon	88.945
Long Distance	Marathon	88.8663
Long Distance	Half Marathon	89.2155
Long Distance	Half Marathon	90.1816
Long Distance	Half Marathon	89.3662
Long Distance	Half Marathon	89.0769
Long Distance	Half Marathon	88.8182
Long Distance	Half Marathon	88.6589
Long Distance	10 k	88.365
Long Distance	10 k	88.7732
Long Distance	10 k	88.3482
Long Distance	10 k	88.3056
Long Distance	10 k	88.2277
Long Distance	10 k	88.1784
Medium Distance	5 k	88.8982
Medium Distance	5 k	89.1297
Medium Distance	5 k	89.0442
Medium Distance	5 k	88.8852
Medium Distance	5 k	88.7217
Medium Distance	5 k	88.7151
Medium Distance	3000 m	88.4954
Medium Distance	3000 m	88.8333
Medium Distance	3000 m	88.5633
Medium Distance	3000 m	88.5196
Medium Distance	3000 m	88.3382
Medium Distance	3000 m	88.2298
Medium Distance	1500 m	88.4867
Medium Distance	1500 m	88.9884
Medium Distance	1500 m	88.4201
Medium Distance	1500 m	88.396
Medium Distance	1500 m	88.337
Medium Distance	1500 m	88.3008
Medium Distance	800 m	88.6324
Medium Distance	800 m	88.5564
Medium Distance	800 m	88.5762
Medium Distance	800 m	88.693
Medium Distance	800 m	88.6949
Medium Distance	800 m	88.6406
Short Distance	400 m	89.6401
Short Distance	400 m	89.999
Short Distance	400 m	89.6681
Short Distance	400 m	89.5262
Short Distance	400 m	89.5305
Short Distance	400 m	89.4826
Short Distance	200 m	90.1873
Short Distance	200 m	89.6541
Short Distance	200 m	90.1679	`
Short Distance	200 m	90.3472
Short Distance	200 m	90.3686
Short Distance	200 m	90.394
Short Distance	100 m	90.9855
Short Distance	100 m	91.0124
Short Distance	100 m	91.0856
Short Distance	100 m	90.987
Short Distance	100 m	90.9066
Short Distance	100 m	90.9369
Short Distance	60 m	92.1837
Short Distance	60 m	92.0351
Short Distance	60 m	92.2669
Short Distance	60 m	92.2736
Short Distance	60 m	92.1879
Short Distance	60 m	92.1541
Jumping	High Jump	85.5135
Jumping	High Jump	85.4845
Jumping	High Jump	85.5837
Jumping	High Jump	85.5
Jumping	High Jump	85.4167
Jumping	High Jump	85.583
Jumping	Long Jump	84.8411
Jumping	Long Jump	84.7917
Jumping	Long Jump	85.0528
Jumping	Long Jump	84.8712
Jumping	Long Jump	84.7776
Jumping	Long Jump	84.7109
Jumping	Triple Jump	84.6904
Jumping	Triple Jump	84.6464
Jumping	Triple Jump	84.7133
Jumping	Triple Jump	84.648
Jumping	Triple Jump	84.6869
Jumping	Triple Jump	84.7583
Long Distance	Marathon	88.95
Long Distance	Marathon	89.2257
Long Distance	Marathon	88.9888
Long Distance	Marathon	89.0642
Long Distance	Marathon	88.7477
Long Distance	Marathon	88.7299
Long Distance	Half Marathon	88.8887
Long Distance	Half Marathon	89.9801
Long Distance	Half Marathon	88.9904
Long Distance	Half Marathon	88.7654
Long Distance	Half Marathon	88.5348
Long Distance	Half Marathon	88.204
Long Distance	10 k	88.3638
Long Distance	10 k	88.9932
Long Distance	10 k	88.5509
Long Distance	10 k	88.2744
Long Distance	10 k	88.1041
Long Distance	10 k	87.9142
Medium Distance	5 k	88.5468
Medium Distance	5 k	89.0067
Medium Distance	5 k	88.5056
Medium Distance	5 k	88.4941
Medium Distance	5 k	88.4933
Medium Distance	5 k	88.2427
Medium Distance	3000 m	88.2036
Medium Distance	3000 m	88.733
Medium Distance	3000 m	88.3007
Medium Distance	3000 m	87.9732
Medium Distance	3000 m	88.0019
Medium Distance	3000 m	88.0235
Medium Distance	1500 m	88.807
Medium Distance	1500 m	89.4117
Medium Distance	1500 m	88.777
Medium Distance	1500 m	88.6026
Medium Distance	1500 m	88.6042
Medium Distance	1500 m	88.5497
Medium Distance	800 m	88.6944
Medium Distance	800 m	88.9515
Medium Distance	800 m	88.8386
Medium Distance	800 m	88.7129
Medium Distance	800 m	88.5233
Medium Distance	800 m	88.4515
Short Distance	400 m	89.4238
Short Distance	400 m	89.7422
Short Distance	400 m	89.3573
Short Distance	400 m	89.4233
Short Distance	400 m	89.3371
Short Distance	400 m	89.2656
Short Distance	200 m	90.1979
Short Distance	200 m	90.1405
Short Distance	200 m	90.6779
Short Distance	200 m	90.2194
Short Distance	200 m	90.0721
Short Distance	200 m	89.8857
Short Distance	100 m	91.2647
Short Distance	100 m	91.1413
Short Distance	100 m	91.3991
Short Distance	100 m	91.3007
Short Distance	100 m	91.324
Short Distance	100 m	91.1581
Short Distance	60 m	92.013
Short Distance	60 m	92.1166
Short Distance	60 m	92.0981
Short Distance	60 m	92.0648
Short Distance	60 m	91.9218
Short Distance	60 m	91.8659
Jumping	High Jump	85.2126
Jumping	High Jump	85.5841
Jumping	High Jump	85.5467
Jumping	High Jump	85.1789
Jumping	High Jump	84.9535
Jumping	High Jump	84.7881
Jumping	Long Jump	84.0106
Jumping	Long Jump	84.2435
Jumping	Long Jump	84.3345
Jumping	Long Jump	84.0922
Jumping	Long Jump	83.786
Jumping	Long Jump	83.5821
Jumping	Triple Jump	84.3435
Jumping	Triple Jump	84.8888
Jumping	Triple Jump	84.7314
Jumping	Triple Jump	84.5702
Jumping	Triple Jump	83.9213
Jumping	Triple Jump	83.5855
Event	SES	SES SD
Marathon	88.9841	0.194866
Half-marathon	89.0567	0.569808
10 k	88.3666	0.291196
5 k	88.7236	0.273071
3 k	88.3513	0.283461
1500 m	88.6401	0.318035
800 m	88.6638	0.13621
400 m	89.533	0.204026
200 m	90.1927	0.258287
100 m	91.1252	0.165791
60 m	92.0985	0.126298
HJ	85.3621	0.268573
LJ	84.4245	0.48142
TJ	84.5153	0.384862
Event Category	SES	SES SD
Long distance	88.8025	0.489128
Medium distance	88.5947	0.292208
Short Distance	90.7373	0.996495
Jumping	84.7673	0.570454

## Sheet: HS Participation Rates
	XC HS	T&F HS		Male XC	Male Avg. 3k	Female XC	Female Avg. 3k	XC SES	XC SES	Male 100 m	Male Avg.	Female 100 m	Female Avg.	100m SES
F participants	219345	488267		00:15:13.700000	00:15:59.418000	00:17:00.300000	00:18:16.913000	Total:	87.4653	10.41	10.6587	11.48	11.819	90.1826
M participants	269295	605354		00:15:19.500000	00:15:30.377000	00:17:01	00:17:31.592000	First third:	88.4732	10.43	10.491	11.54	11.619	90.2918
				00:15:25.100000	00:16:01.085000	00:17:14	00:18:12.177000	Second third:	87.9972	10.44	10.662	11.56	11.79	90.4326
Ratio (F/M)	0.814516	0.806581		00:15:25.300000	00:16:26.792000	00:17:20.100000	00:19:06.969000	Final third:	86.0348	10.45	10.8082	11.57	12.0273	89.8639
PD	18.5484	19.3419		00:15:25.400000		00:17:29.600000			87.4926	10.46		11.58		90.1927
				00:15:27.400000		00:17:30				10.5		11.65
				00:15:30.100000		00:17:32.200000		XC SES SD:	1.05548	10.53		11.68	100m SES SD:	0.209483
				00:15:30.900000		00:17:42				10.53		11.68
				00:15:31.500000		00:17:43.400000				10.56		11.72
				00:15:36.600000		00:17:43.900000				10.6		11.73
				00:15:37.400000		00:17:48.400000				10.6		11.74
				00:15:45.900000		00:17:50.900000				10.6		11.76
				00:15:46.100000		00:17:54.900000				10.63		11.77
				00:15:52.400000		00:18:01.400000				10.64		11.78
				00:15:53.800000		00:18:02.200000				10.66		11.79
				00:15:55.700000		00:18:05.700000				10.68		11.8
				00:15:56.700000		00:18:06.300000				10.68		11.8
				00:15:57.300000		00:18:08.700000				10.69		11.81
				00:16:00.200000		00:18:12.400000				10.71		11.82
				00:16:01.900000		00:18:14				10.73		11.83
				00:16:02.800000		00:18:14				10.73		11.87
				00:16:04.300000		00:18:15				10.76		11.93
				00:16:04.900000		00:18:16.400000				10.76		11.94
				00:16:06.300000		00:18:18.700000				10.78		11.97
				00:16:07.100000		00:18:20.700000				10.79		11.99
				00:16:10.700000		00:18:22.800000				10.79		12
				00:16:11.100000		00:18:27.200000				10.81		12.02
				00:16:14.800000		00:18:29.800000				10.85		12.03
				00:16:16.400000		00:18:31.800000				10.87		12.05
				00:16:18.300000		00:18:31.900000				10.87		12.16
				00:16:19		00:18:49.800000				10.88		12.34
				00:16:19.500000		00:18:54.500000
				00:16:20.300000		00:18:56.200000
				00:16:23.800000		00:19:00.600000
				00:16:23.800000		00:19:08
				00:16:24.900000		00:19:15.200000
				00:16:38.600000		00:19:18.100000
				00:16:54.100000		00:19:34.300000
				00:17:03.700000		00:21:33.200000
Outdoor track 100 m	90.1826
Outdoor track 100 m	90.2918
Outdoor track 100 m	90.4326
Outdoor track 100 m	89.8639
Cross-country 5k	87.4653
Cross-country 5k	88.4732
Cross-country 5k	87.9972
Cross-country 5k	86.0348
